# Supplementary material for: Compatibility Evaluation and Anatomical Observation of Melon Grafted Onto Eight Cucurbitaceae Species
Source: Front Plant Sci. 2021 Oct 20;12:762889. doi: 10.3389/fpls.2021.762889 (PMC8563831; doi:10.3389/fpls.2021.762889)
Supplement: Supplementary file 2 [file Table_1.XLSX]

## Sheet: Sheet1
Table S1. List of all species used in this experiment
Species	Abbreviation	Cultivar name	Scientific name	Origin
melon	M	Akekekouqi	Cucumis melo	Xinjiang Academy of Agricultural Sciences
cucumber	Cu1	Shangping	Cucumis sativus	Tianjin Gengyun Seeds Co., Ltd.
cucumber	Cu2	Liangyou D18	Cucumis sativus	Tianjin Yiliante Technology Development Co., Ltd.
cucumber	Cu3	Shengqing No.1	Cucumis sativus	Shanghai Funong Seeds Co., Ltd.
cucumber	Cu4	Jinyou No.35	Cucumis sativus	Tianjin Kernel Agricultural Technology Co., Ltd.
cucumber	Cu5	Luyou No.56	Cucumis sativus	Tianjin Lvfeng Horticultural New Technology Development Co., Ltd.
cucumber	Cu6	Biyu No.3	Cucumis sativus	Shandong Fengpei Agricultural Technology Co., Ltd.
pumpkin	Pu1	Qingyouzhen No.1	Cucurbita maxima × Cucurbita moschata	China Vegetable Seed Technology (Beijing) Co.,Ltd.
pumpkin	Pu2	Sizhuang No.12	Cucurbita maxima × Cucurbita moschata	Ningbo Academy of Agricultural Sciences
pumpkin	Pu3	Zhuangshi	Cucurbita maxima × Cucurbita moschata	Known You Seed (China) Co., Ltd.
pumpkin	Pu4	Bijiu	Cucurbita maxima × Cucurbita moschata	Jinan Wolpusi Agricultural Technology Co., Ltd.
pumpkin	Pu5	Xuetieqi	Cucurbita maxima × Cucurbita moschata	Beijing Deli Tianfeng Agricultural Technology Co., Ltd.
pumpkin	Pu6	Jingxinzhen No.5	Cucurbita maxima × Cucurbita moschata	Jingyan Yinong (Beijing) Seed Sci-Tech Co., Ltd.
luffa	Lu1	Sanbi No.6	Luffa cylindrica	Changde Ding Pai Seed Co., Ltd.
luffa	Lu2	Xiang Luffa	Luffa cylindrica	Xuzhou Pishu Agricultural Science and Technology Co., Ltd.
luffa	Lu3	Cuixiu	Luffa cylindrica	Shouguang Xinxinran Horticulture Co., Ltd.
luffa	Lu4	Duobaorou	Luffa cylindrica	Shouguang Xinxinran Horticulture Co., Ltd.
luffa	Lu5	Shoutian No.2	Luffa cylindrica	Guangdong Helinong Seeds Co., Ltd.
wax gourd	Wax1	Lvbao	Benincasa hispida	Xuzhou Pishu Agricultural Science and Technology Co., Ltd.
wax gourd	Wax2	Heihu	Benincasa hispida	Guangzhou Lvba Seed Co., Ltd.
wax gourd	Wax3	Aonong	Benincasa hispida	Guangdong Kenong Vegetable Seed Industry Co., Ltd.
wax gourd	Wax4	Xiao Cuimei	Benincasa hispida	Changde Ding Pai Seed Co., Ltd.
wax gourd	Wax5	No.365	Benincasa hispida	Changde Ding Pai Seed Co., Ltd.
bottle gourd	Bo1	H23	Lagenaria siceraria	Huazhong agricultural university
bottle gourd	Bo2	Fengzheng No.1	Lagenaria siceraria	Qingdao International Seed Co., Ltd.
bottle gourd	Bo3	H19	Lagenaria siceraria	Huazhong agricultural university
bottle gourd	Bo4	Jingxinzhen No.1	Lagenaria siceraria	Jingyan Yinong (Beijing) Seed Sci-Tech Co., Ltd.
bottle gourd	Bo5	H28	Lagenaria siceraria	Huazhong agricultural university
bottle gourd	Bo6	H15	Lagenaria siceraria	Huazhong agricultural university
bitter gourd	Bi1	Meibao	Momordica charantia	Guangdong Helinong Seeds Co., Ltd.
bitter gourd	Bi2	Changlv	Momordica charantia	Qingxian Chunfeng Vegetable Breeding Farm
bitter gourd	Bi3	Zajiao Youshen	Momordica charantia	Guangdong Helinong Seeds Co., Ltd.
bitter gourd	Bi4	Liangku No.1	Momordica charantia	Shouguang Xinxinran Horticulture Co., Ltd.
bitter gourd	Bi5	Xiao Naigua	Momordica charantia	Shouguang Xinxinran Horticulture Co., Ltd.
watermelon	Wa1	Yeniu No.1	Citrullus lanatus	Ningbo Top-Yield Seed Technology Co., Ltd.
watermelon	Wa2	Zaojia 8424	Citrullus lanatus	Shanghai Wells Seed Co., Ltd.
watermelon	Wa3	Yongshi	Citrullus lanatus	Taiwan Yihe Seedling Co., Ltd.
watermelon	Wa4	Ping 87-14	Citrullus lanatus	Hefei Fengle Seed Industry Co., Ltd.
watermelon	Wa5	Weili 2013	Citrullus lanatus	Jinan Weili Seed Industry Co., Ltd.
watermelon	Wa6	97103	Citrullus lanatus	Beijing Academy of Agriculture and Forestry Sciences
